# Supplementary material for: H. pylori attenuates TNBS-induced colitis via increasing mucosal Th2 cells in mice
Source: PubMed Central journal article supplement (PMC5650302; doi:10.18632/oncotarget.17962), 2017-05-18
Supplement: oncotarget-08-73810-s001.pdf [file oncotarget-08-73810-s001.pdf]

## *H. pylori* attenuates TNBS-induced colitis via increasing mucosal Th2 cells in mice

### Supplementary Materials

**Supplementary Table 1: Real-time PCR primer sequences for selected genes**

| Gene           | Sense                  | Antisense             |
|----------------|------------------------|-----------------------|
| IL-4           | AAACGTCCTCACAGCAACGA   | GCATCGAAAAGCCCCGAAAGA |
| IL-5           | AGGCTTCCTGTCCCTACTCA   | CCCCCACGGACAGTTTGATT  |
| IL-6           | GTGGCTAAGGACCAAGACCA   | ATAACGCACTAGGTTTGCCGA |
| IL-10          | CAGTACAGCCGGGAAGACAA   | CCTGGGGCATCACTTCTACC  |
| IL-12p35       | ACCCTTGCATCTGGCGTCTA   | TGGTCTTCAGCAGGTTTCGG  |
| IL-23p19       | TGGAGCAACTTCACACCTCC   | GGCAGCTATGGCCAAAAGG   |
| IL-17A         | TACCTCAACCGTCCACGTC    | ATGTGGTGGTCCAGCTTTCC  |
| IL-1 $\beta$   | TGCCACCTTTTGACAGTGATG  | AAGGTCCACGGGAAAGACAC  |
| TGF- $\beta$   | GCTGAACCAAGGAGACGGAA   | AGAAGTTGGCATGGTAGCCC  |
| TNF- $\alpha$  | GGTCCCCAAAGGGATGAGAAG  | TTGGTGGTTTGCTACGACG   |
| IFN- $\gamma$  | CGGCACAGTCATTGAAAGCC   | TGCATCCTTTTTTCGCCTTG  |
| STAT-1         | GGATCGCTTGCCCAACTCTT   | TGGTCGCAAACGAGACATCA  |
| STAT-3         | ACCAACGACCTGCAGCAATA   | TCCATGTCAAACGTGAGCGA  |
| STAT-6         | GCCAGGGTTTACAGTGAAGAAG | AGCCGTTGCAGTTTTTCTGG  |
| $\beta$ -actin | CCACCATGTACCCAGGCATT   | AGGGTGTAAAACGCAGCTCA  |

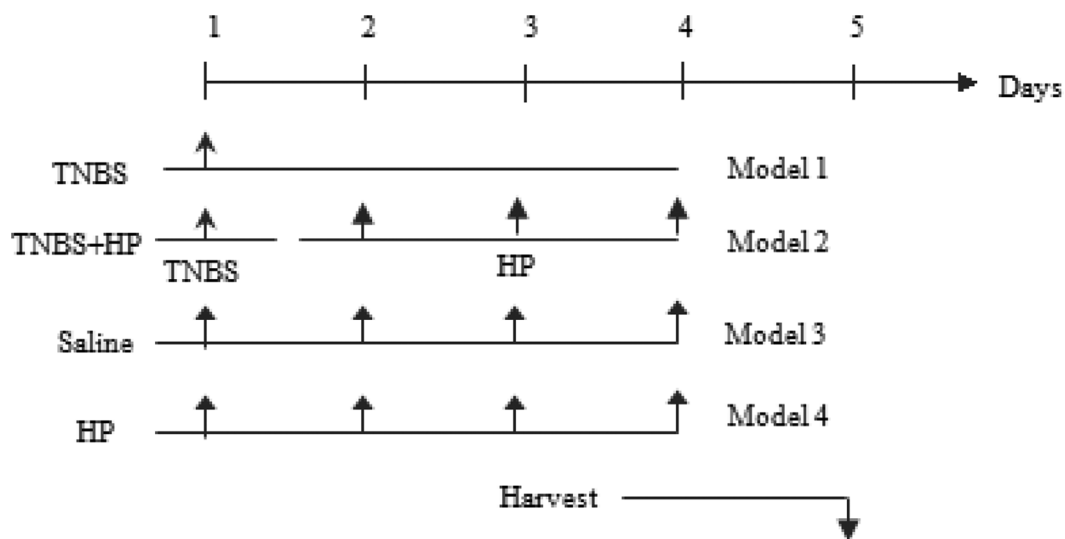

**Supplementary Figure 1: Overview of models 1, 2, 3 and 4.** In model 1, mice were treated with TNBS enema at day 1. In model 2, mice were treated with TNBS enema at days and HP enema at days 2, 3 and 4. In models 3 and 4, mice were treated with saline and HP enema, respectively. All mice from models 1, 2, 3 and 4 were harvested at day 5.
